# Supplementary material
Source: PubMed Central journal article supplement (PMC4313800)
Supplement: pnas.1411610112.sapp.pdf [file pnas.1411610112.sapp.pdf]

**Supplementary Information:**

**Table S1: T3SS proteins in various families of T3SS and the flagellum.**

| Injectisomes    |                            |                 |                    | Flagella | Structure/<br>function           | Location                                           |
|-----------------|----------------------------|-----------------|--------------------|----------|----------------------------------|----------------------------------------------------|
| <i>Shigella</i> | <i>Salmonella</i><br>SPI-1 | <i>Yersinia</i> | <i>P. syringae</i> |          |                                  |                                                    |
| Spa33           | SpaO                       | YscQ            | HrcQA/B            | FliM/N   | 'Pods'; C ring                   | cytoplasm                                          |
| MxiN            | OrgB                       | YscL            | HrpE               | FliH     | Stabilization of ATPase location | cytoplasm                                          |
| MxiK            | OrgA                       | YscK            | HrpD               | -        |                                  | cytoplasm                                          |
| Spa47           | InvC                       | YscN            | HrcN               | FliI     | ATPase                           | cytoplasm                                          |
| Spa13           | InvI                       | YscO            | HrpO               | FliJ     | ATPase-associated stalk          | cytoplasm                                          |
| Spa24           | SpaP                       | YscR            | HrcR               | FliP     | export apparatus protein         | cytoplasmic membrane                               |
| Spa9            | SpaQ                       | YscS            | HrcS               | FliQ     | export apparatus protein         | cytoplasmic membrane                               |
| Spa29           | SpaR                       | YscT            | HrcT               | FliR     | export apparatus protein         | cytoplasmic membrane                               |
| Spa40           | SpaS                       | YscU            | HrcU               | FliB     | export apparatus protein         | cytoplasmic membrane with large cytoplasmic domain |
| MxiA            | InvA                       | YscV            | HrcV               | FliA     | export apparatus protein         | cytoplasmic membrane with large cytoplasmic domain |
| MxiD            | InvG                       | YscC            | HrcC               | -        | secretin                         | outer membrane                                     |
| MxiG            | PrgH                       | YscD            | HrpQ               | -        | MS ring?                         | cytoplasmic membrane                               |
| MxiJ            | PrgK                       | YscJ            | HrcJ               | FliF     | MS ring                          | cytoplasmic membrane                               |
| MxiM            | InvH                       | YscW            | -                  | -        | pilotin                          | outer membrane                                     |
| MxiH            | PrgI                       | YscF            | HrpA               | -        | needle filament                  | external                                           |
| MxiI            | PrgJ                       | YscI            | HrpB               | -        | inner rod                        | inside of basal body                               |
| Spa32           | InvJ                       | YscP            | HrpP               | FliK     | control needle length            | inside of basal body                               |
| IpaD            | SipD                       | LcrV            | -                  | -        | needle tip complex               | tip of needle                                      |
| IpaB/C          | SipB/C                     | YopB/D          | HrpK               | -        | hydrophobic translocator         |                                                    |
| MxiC            | InvE                       | YopN            | HrpJ               | -        |                                  |                                                    |

**Table S2: Sequence alignment between *S. enterica* PrgH and *S. flexneri* MxiG.**

|      |                                                                         |     |
|------|-------------------------------------------------------------------------|-----|
| MxiG | -MSEAKNSNLAPFRLLVKLTNG--VGDEFPLLYGNNLIVLGRTIETLEFGND-NFPEN--            | 54  |
| PrgH | METSKEKTITSPGPYIVRLLNSSLNGCEFPLLTGRTLFVVGQSDALTASGQLPDI PDSF            | 60  |
|      | .. :: : * : * * * . * * * * * . * . * * * : : * : : * : :               |     |
| MxiG | IIPVTDKSDGIIYLTIISKDNICQFSDEKGEQIDINSQFNS-FEYDGISFHLKMNRE---            | 110 |
| PrgH | FIPLDHGGVNFEIQVDTDATEIILHELKEGNSESRSVQLNTPIQVGELLILIRPESEPWV            | 120 |
|      | : * * : . . : * : . : * . . : * . . : * . . : * * : : . : : : : * :     |     |
| MxiG | -----DKSRGHILNGMYKNHSVFFFVAV--IVVLIIFSLSLKKDEVKEIAEII                   | 157 |
| PrgH | PEQPEKLETSAKKNEPRFKNGIVAAAGFFILGIGTVGTWILNSPQRQAELDSLQGE                | 180 |
|      | . * . . : * * : : * * : : : * * : : : . * * * * . : * : : :             |     |
| MxiG | DDKRYGIVNTGQCNYILAETQNDVAVASVALNKTGFTKCRYILVSNKEINRIQQYINQRF            | 217 |
| PrgH | KERFQVLPGRDKMLYVAAQNERDTLWARQVLARGDYDKNARVINENENKRISIWLDITY             | 240 |
|      | . : . : . : . : * : * : . : * * : * * : * : . : * : * : * * : : : :     |     |
| MxiG | PFINLYVLNLVSDKAELLVFLSKERNSSKDTLDELKLNALIVEFPYIKNIKFNLYLSDHNA           | 277 |
| PrgH | PQLAYYRIHFD-EPRKPVFWSRQRNMTSKKELEVLSQLRALMPYADSVNITLMDDVTA              | 299 |
|      | * : * : : : : : : * * * * * : . . * * : * : * . : * * . . . . . : * * * |     |
| MxiG | RGDAKGIPTKVNQYKEICENNKVTVSVREELTDEKLELINRLISEHKNIYGDQYIEFSV             | 337 |
| PrgH | AGQAEAGLKQALPYSRNRHKGVTFVIQGALDDVEILRARQFVDSYRRTWGGRYVQFAI              | 359 |
|      | * * : . . : : * . . . . : * * : : * * : : . : : : . : * * : * * : :     |     |
| MxiG | LLIDDDFKGKSYLNSKDSYVMLNDKHWFLLDKNK                                      | 371 |
| PrgH | ELKDDWLKGRSFQYGAEGYIKMSPGHWFPSPL-                                       | 392 |
|      | * * * : * * : * : . . : * * : . . * * * .                               |     |

The sequence identity between MxiG and PrgH is 21%. The transmembrane domain is labeled in red.

**Table S3: Sequence alignment between *S. flexneri* Spa47, *S. enterica* FliI, and *T. thermophilus* V-type ATP synthase subunit B.**

|          |                                                                     |     |
|----------|---------------------------------------------------------------------|-----|
| Spa47    | --MSYTKLLTQLS-----FP-----NRISGPILETSLSDVDSIGEICNIQAGIES             | 42  |
| FliI     | MTRLRTRWLTALDNFEAKMALLPAVRRYGRLTRATGLVLEATGLQLPLGATCIIERQDGP        | 60  |
| V-ATPase | --MDLLKKEYTGIT-----YISGPLLFVENAKDLAYGAIVDIKDG TG-                   | 40  |
|          | . : * : : : : : : : : : : : : : : : : : : : : : : : : : : : : : : : |     |
| Spa47    | NEIVARAQVVGFHDEKTI LS-----LIGNSRGLSRQTLIKPTAQFLH-TQVGRGLLGA         | 94  |
| FliI     | ETKEVESEVVGFNQRLFLMPLLEVEGILPGARVYARNHGHDGLQSGKQ-LPLGPALLGR         | 119 |
| V-ATPase | --RVRGGQVIEVSEYAVIQ-----VFEEETGLDLATTSVSLVEDVARLGVSKEMLGR           | 91  |
|          | . : * * : . : : : : : : : : : : : : : : . : : : : : : : * * :       |     |
| Spa47    | VVNPLGEVTDKFAVTDNSEILYRPVDNAPPLYSERAAIEKPFLLTGKVIDSLLTCGEGQR        | 154 |
| FliI     | VLDDGGKPLDGLPAPDTLETGALITPPFNPL--QRTPIEHVLDTGVRAINALLTVGRGQR        | 177 |
| V-ATPase | RFNGIGKPIDGLPPTPEKRLPITGLPLNPV--ARRKPEQFIQTGSTIDVMNTLVRGQK          | 149 |
|          | . : * : * : . : : : : : : : : * : * * : : * * : * * : * * : * * :   |     |
| Spa47    | MGIFASAGCGKTFMLNMLIEHSGAD-----IYVIGLIGERGREVTE TVDYLK               | 201 |
| FliI     | MGLFAGSGVGVKSVLLGMMARYTRAD-----VIVVGLIGERGREV KDFIENIL              | 224 |
| V-ATPase | LPIFSGSLPANEIAAQIARQATVPRDLSGEKEEFPFAVVFAMGITQRELSYFIQEF            | 209 |
|          | : : * : * * . : : : : : : : : . * . : * * * . : : : : : : :         |     |
| Spa47    | NSEKKSRCVLVYATS DYSSVDRCNAAIYATAIAE FFR-TEGHKVALFIDSLTRYARALRD      | 260 |
| FliI     | GPDGRARSVVIAAPADVSP LRMQGAAYATRIAEDFR-DRGQHVLLIMDSLTRYAMAQRE        | 283 |
| V-ATPase | RTGALSRSVLFLNKADDP TIERILTPRMALTVAEYLA FEHDYHVLVILDTMTNYCEALRE      | 269 |
|          | . : * * : . : * . . : * . : * * : * * : . . : * : : : : * * . * * : |     |
| Spa47    | VALAAGESPARRGYPVSVFDSLPRLLERPGK-LKAGGSITAFYTVLLEDDFADPLAEV          | 319 |
| FliI     | IALAIGEPPATKGYPPSVFAKLPALVERAGN IHGGGSITAFYTVLTEGDDQDPIADSA         | 343 |
| V-ATPase | IGAAREEIPGRRGYPGYMYTDLATIYERAGVVEGKGSVTPILSMPDDDRTHPIPDLT           | 329 |
|          | . : * * * . : * * : : * * : * * : * * : * * : : : * * . * * : . :   |     |
| Spa47    | RSILDGHIYLSRNLAQKGFPAIDSLK SISRVT-----QVVEKHRIMAAAFRELLSE           | 373 |
| FliI     | RAILDGHIYLSRNLAQKGFPAIDSLK SISRVT-----ALITEQHYARVRLFKQLLSS          | 397 |
| V-ATPase | GYITEGQIQLSRELHRKGIYPPIDPLPSLSRLMNGVVGKGTREDHKQVSDQLYSAYANG         | 389 |
|          | * : * * * * * . * : * * * * * : * * : . : : : : : : : : : : : :     |     |
| Spa47    | IEELRTIIDFGEYKPGENA-----SQDKIYNKISVVESFLKQD                         | 411 |
| FliI     | FQRNRDLVSVGAYAKGSDP-----MLDKAITLWPQLEAF LQQG                        | 435 |
| V-ATPase | VDIRKLVAIIGEDALTENDRRYLQFADAFERFFINQQQNRSIEESLQIAWALLSMLPQG         | 449 |
|          | . : : : * : : : : : : : : : : : : : : : : : : : : : : : : : : : :   |     |
| Spa47    | YRLGFTYEQTME LIGETIR-----                                           | 430 |
| FliI     | IFERADWEDSLQALDLIFPTV-----                                          | 456 |
| V-ATPase | ELKRISKDHIGKYYGQKLEEIWGAPQALD                                       | 478 |
|          | . : . : . : :                                                       |     |

The sequence identity between Spa47 and FliI is 37%.

**Table S4: Sequence alignment between *S. flexneri* Spa13 and *S. enterica* FliJ.**

|       |                                                              |     |
|-------|--------------------------------------------------------------|-----|
| FliJ  | -MAQHGALETLKDLAEKEVDDAARLLGEMRRGCQQAEQLKMLIDYQNEYRSNLNTDMGN  | 59  |
| Spa13 | MLKIKDKYQRSVKLIEAHILTLKKN-SLYRDVEALDKRIYFLQLENDLEP-----VG-   | 53  |
|       | : . : . * * . : : . : * . : : : : : : : : * : *              |     |
| FliJ  | GIASNRWINYQQFIQTLEKAIEQHRLQLTQWTQKVDLALKSWREK--KQRLQAWQTLQDR | 117 |
| Spa13 | AQSVSOLFNTRRKIAIVKHHI IQYQSERILLKGRIEEIQKDIDEANASKRKLHKEKIC  | 113 |
|       | : . : . : * : : * : : * * * : : : . : : : * . * . : * : : :  |     |
| FliJ  | QTAAALLAENRMDQKMDQRAAMRKPE                                   | 147 |
| Spa13 | KRIGLIKRNNAKQLILDELSQEDMKYGIR                                | 143 |
|       | : . : . : * . * : * : : * . .                                |     |

The whole sequence of Spa13 was identified in (50). The sequence similarity between FliJ and Spa13 is 24%, and the identity is 13%.

50. Penno C, *et al.* (2006) Transcriptional slippage controls production of type III secretion apparatus components in *Shigella flexneri*. *Mol Microbiol* 62(5):1460-1468.

**Table S5: Sequence alignment between *S. flexneri* Spa33 (293 aa) and *S. enterica* FliN (137 aa).**

|       |                                                                          |     |
|-------|--------------------------------------------------------------------------|-----|
| FliN  | -----                                                                    |     |
| Spa33 | MLRIKHFDANEKLQILYAKQLCERFSIQTFKNKFTGSESLVTLTSSVCGDWVIRIDTLSFL            | 60  |
| FliN  | -----                                                                    |     |
| Spa33 | KKKYEVFSGFSTQESLLHLSKCVFISSSVFSIPELSDKITFRITNEIQYATTGSHLCCF              | 120 |
| FliN  | -----                                                                    |     |
| Spa33 | SSSLGIYFDKMPVLRNQVSLDLHHLLEFCLGSSNVRLATLKRIRTGDI IIVQKLYNLL              | 180 |
|       | : : : . : : : : * :                                                      |     |
| FliN  | LN-----EKKATTNKSAADAVFQQLGGDVSGAMQDIDLIMDIPVKLTVE                        | 76  |
| Spa33 | LCNQVIIGDYIVNDNNEAKINLSENGESDHTEVSLALFNYYDDINVKVDFILLEKMTIN              | 240 |
|       | * : . . * : . * : : . * * * : . * . . : * * :                            |     |
| FliN  | ELLRLTQGSVVALDGLAGEPLDILINGYLIAQGE                                       | 136 |
| Spa33 | ELKMYVENELFKFPDDIVKHVNIKVNGSLVGHGELVSIEDGYGIEISSWVKE-----                | 293 |
|       | ** . : . . . : . : : * : * * : : * * * : * * * : * * * : * * * : * * * : |     |
| FliN  | R                                                                        | 137 |
| Spa33 | -                                                                        |     |

The sequence identity between the C-terminal domain of Spa33 and FliN is 21%. The red residues in FliN form a hydrophobic patch (32), which forms the interaction site for FliH. Those residues, which are largely conserved in Spa33, likely form the binding site for MxiN (homology of FliH).

**Table S6: Oligonucleotides used in construction of *mxiN::tetRA* and *spa33::tetRA* mutants.**

|                    |                                                                         |
|--------------------|-------------------------------------------------------------------------|
| P2                 | TGTAGGCTGGAGCTGCTTCG                                                    |
| <i>mxiN</i> fwd    | TTTGGAGGGAAATTATACGCCTGTAGAAAGAAATTTGTCCCGATTAAATGATTCCGGGGATCCGTCGACC  |
| <i>mxiN</i> rev    | GCTGCAGAGCATTGCTTGCATTTATTTGATTAATCATTAAACAGGATTCTCTGTAGGCTGGAGCTGCTTCG |
| <i>mxiN</i> check  | AGGCCGCTATTCGAAGTGG                                                     |
| <i>spa33</i> fwd   | GGGAATAAAAATAATAGTACAGGATATAATGAACAGAGTGAAGAAGAATGATTCCGGGGATCCGTCGACC  |
| <i>spa33</i> rev   | CGATGAGGGACATGTCACTCAGCATGAGATTACTCCTTTACCATCCAAGATGTAGGCTGGA GCTGCTTCG |
| <i>spa33</i> check | TCTAAAACCGTCAGATCAATTTG                                                 |

**Table S7: Strains and tomographic data collected by using SerialEM and UCSF Tomography, respectively.**

| <b><i>Shigella</i> Strains</b>  | <b>Total no. of tilt series</b> | <b>Pixel size (nm)</b> | <b>Image size</b> | <b>Drift correction?</b> | <b>Total no. of sub-tomograms</b> | <b>Estimated resolution (FSC at 0.5)</b> |
|---------------------------------|---------------------------------|------------------------|-------------------|--------------------------|-----------------------------------|------------------------------------------|
| WT minicells                    | 387                             | 0.445                  | 3710x3838         | Yes                      | 4,631                             | 2.7 nm                                   |
| WT minicells                    | 468                             | 0.504                  | 1855x1855         | No                       | 1,448                             | 3.6 nm                                   |
| $\Delta$ <i>mxiN</i> minicells  | 285                             | 0.504                  | 1855x1855         | No                       | 582                               | 4.7 nm                                   |
| $\Delta$ <i>spa33</i> minicells | 443                             | 0.504                  | 1855x1855         | No                       | 409                               | 5.0 nm                                   |
| Osmotically shocked WT cells    | 334                             | 0.504                  | 1855x1855         | No                       | 754                               |                                          |

Three EM maps have been deposited in the EM Data Bank (<http://www.ebi.ac.uk/pdbe/emdb/>) with Accession Numbers EMD-2667, 2668 and 2669.

**Supplementary Figures:**

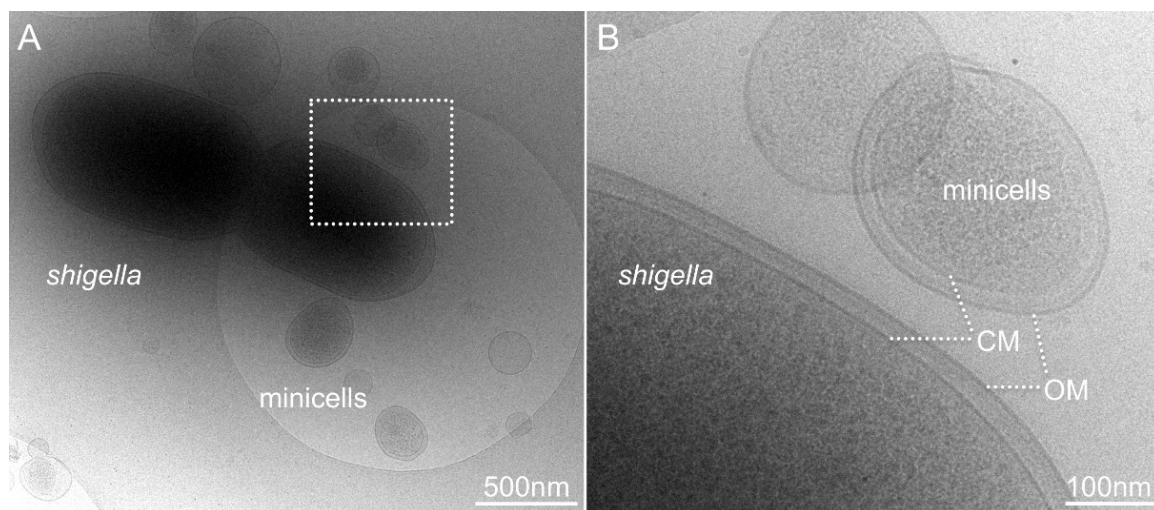

**Figure S1. Cryo-EM shows regular *S. flexneri* cells and very small minicells.** (A) An overview and (B) a zoomed-in view of cryo-EM image. The cell envelopes from regular cells and minicells share similar architecture which is composed of the outer membrane (OM) and the cytoplasmic membrane (CM).

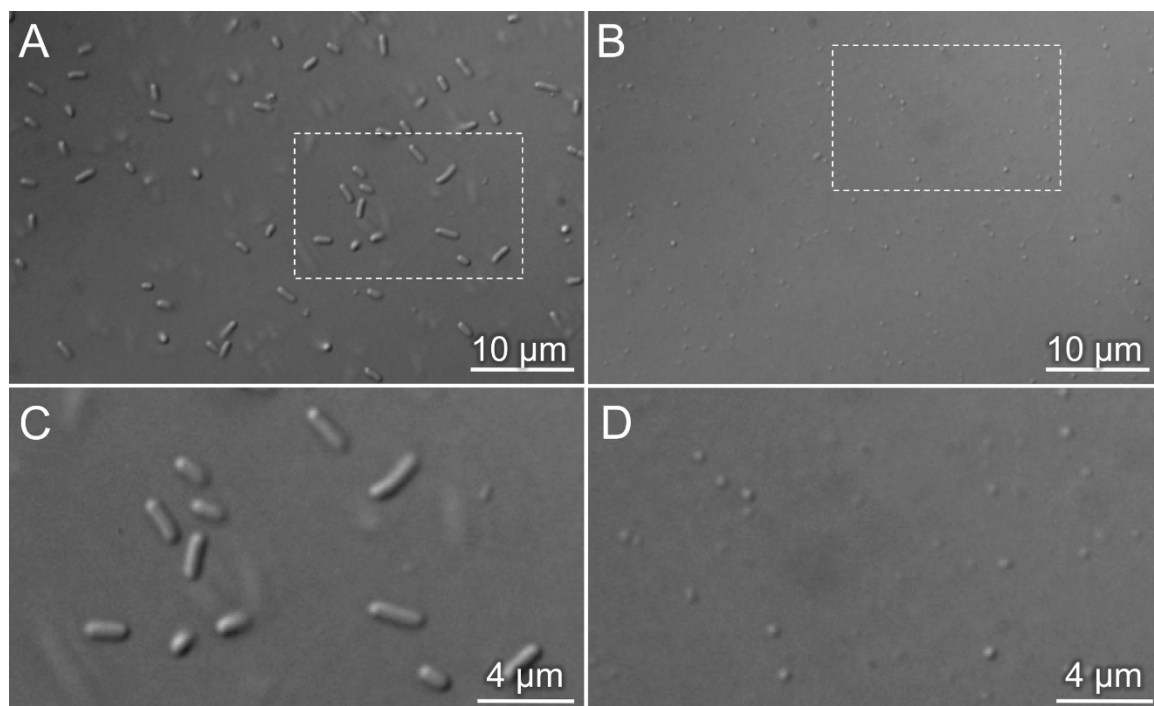

**Figure S2. Light microscopy images of normal *S. flexneri* cells (A) and purified minicells (B).** The zoom-in images are shown in C and D, respectively.

| WT   |    |   | Minicells |         |   |
|------|----|---|-----------|---------|---|
| Mean | SD | N | Mean      | SD      | N |
| 100  | 9  | 3 | 104.2614  | 10.6486 | 3 |

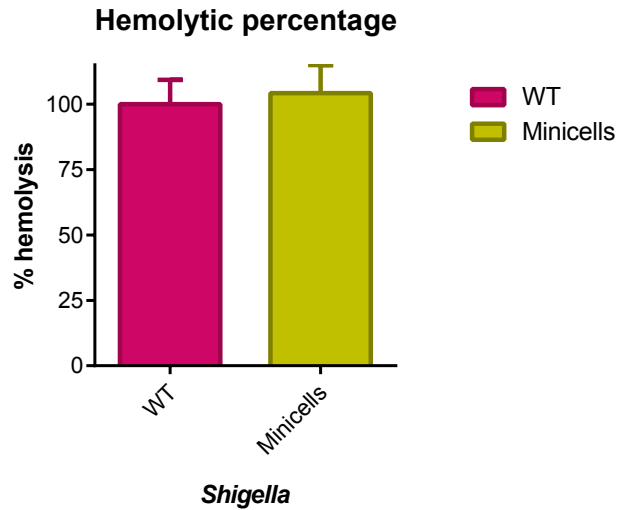

**Figure S3. The *S. flexneri* minicells are similar to WT cells in RBC hemolytic activity.** The level of hemolysis for WT *S. flexneri* was normalized to 100%.

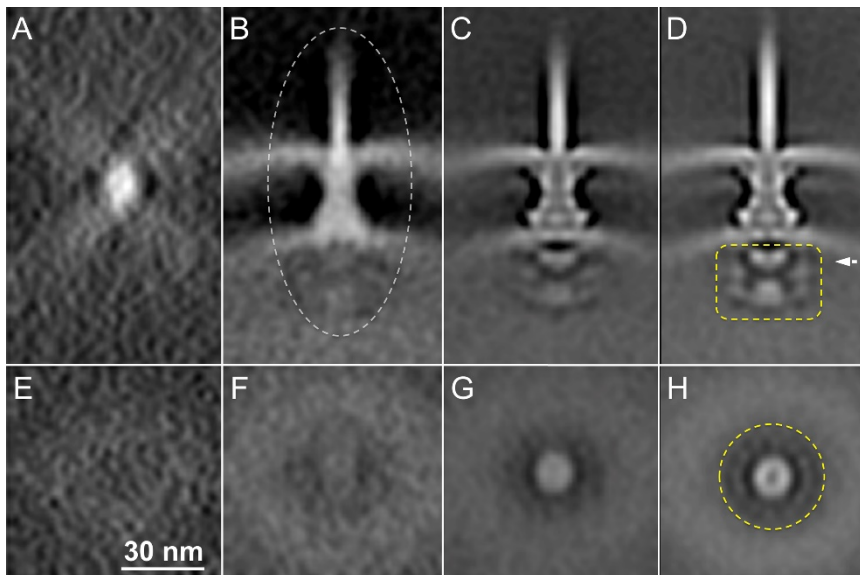

**Figure S4. Initial results from sub-tomogram averaging.** (A) Initial global average of 4,631 sub-tomograms (the size of each sub-tomogram is 400x400x400 voxels), which were extracted from 387 tomographic reconstructions (3,710 x 3,838 x 1,200). The average is feature-less, because of the random orientation of the injectisomes, however, the initial orientation of each particle can be estimated using the basal body and needle tip coordinates, thereby providing two of the three Euler angles. After applying initial rotation based on two Euler angles, the global average is able to reveal a rough structure of the injectisome embedded in two membranes (B). After several cycles of translational alignment, the global average is significantly improved, and the membranes and the needle are clearly visible (C). Further rotational and translation alignment enhances the global average, in which the cytoplasmic features are visible (white dashed arrow) (D). Comparatively, the cytoplasmic features can be seen in the cross sections E to H, after several cycles of alignment. Importantly, the initial alignment (with 4x4x4 binning and low resolution) is fast and reliable, providing a solid foundation for further classification within a 3-D mask (defined by dashed lines in panels D, H).

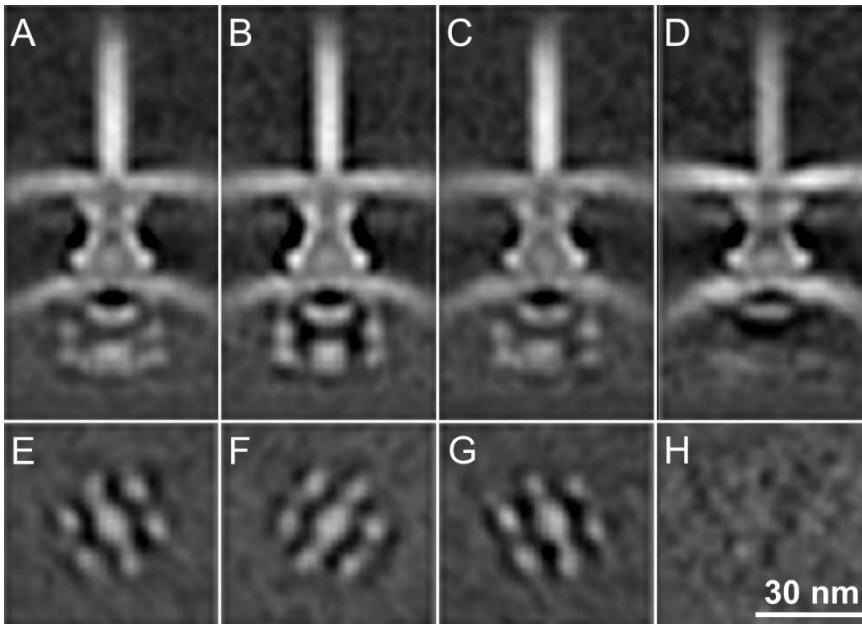

**Figure S5. 3-D classification reveals hexagonal features in the cytoplasm.** After initial alignment, a binary mask for cytoplasmic area was applied (*SI Appendix*, Fig. S4D, H). Relevant voxels of the aligned sub-tomograms were analyzed by multivariate statistical analysis and hierarchical ascendant classification. Three class averages (A, B, C) of injectisomes from minicells contain hexagonal features in the cytoplasm as shown in the cross-sections (E, F, G) at the bottom of the injectisome. In contrast, the class average of the injectisome from the osmotically shocked cells does not contain the cytoplasmic structure (D, H).

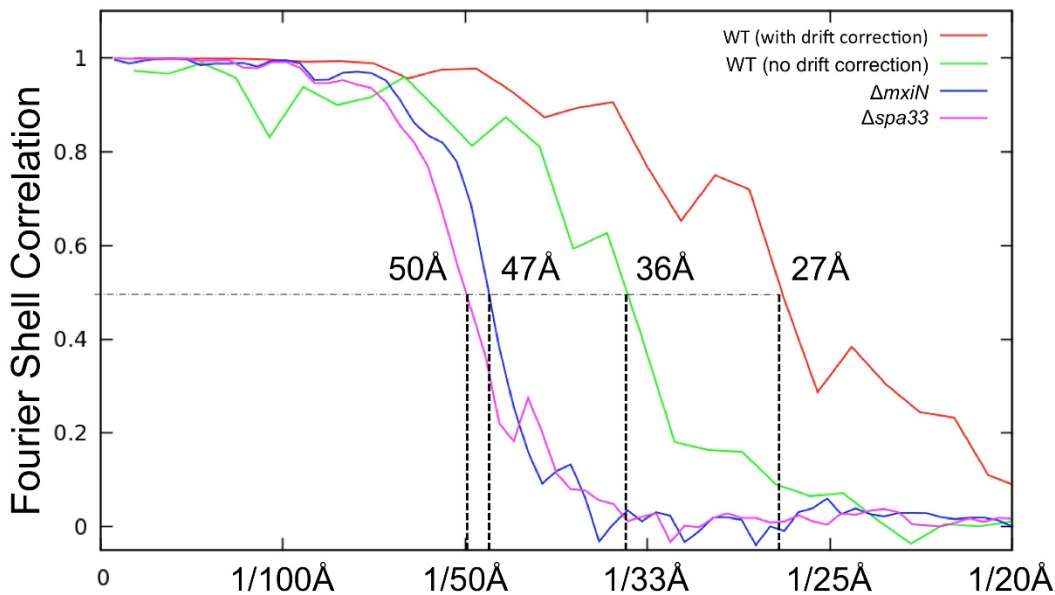

**Figure S6.** The “gold standard FSC” between the two independent reconstructions was used to estimate the resolution of the averaged structures.

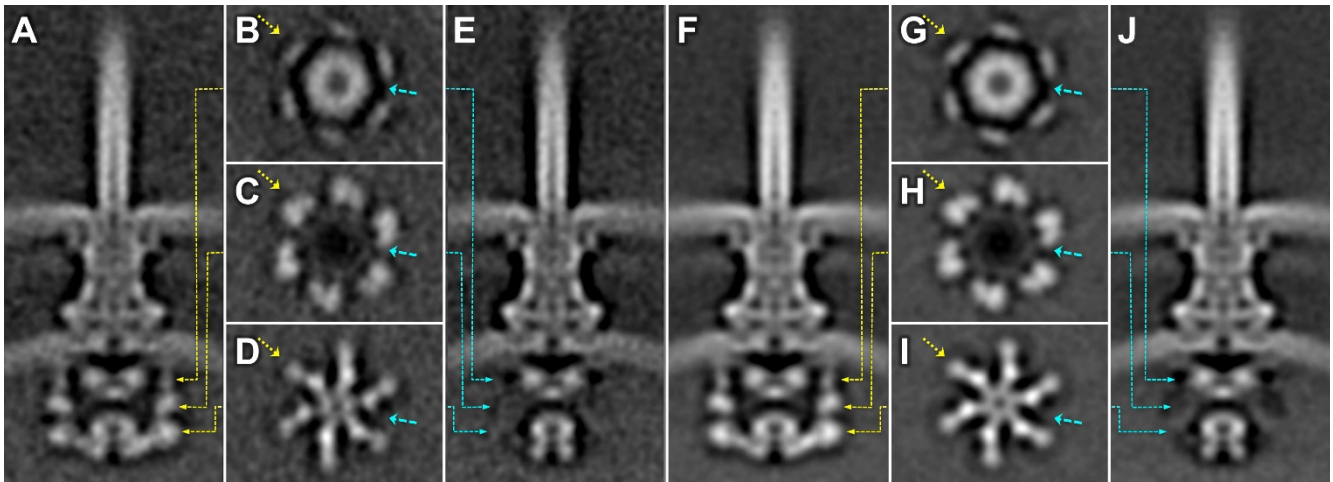

**Figure S7. The cytoplasmic complex exhibits hexagonal features.** Two central sections (A, E) of the injectisome structure without imposing rotational symmetry reveal a large cytoplasmic complex. The location of the first central section (A) is shown by the yellow arrows corresponding to three cross-sections (B, C, D). The location of the second central section (E) is shown by the cyan arrows corresponding to the same three cross-sections (B, C, D). The hexagonal features of the cytoplasmic complex are apparent in these three different cross-sections (B, C, D). After imposing six-fold symmetry, the two central sections (F, J) and the three cross-sections (G, H, I) are revealed more clearly.

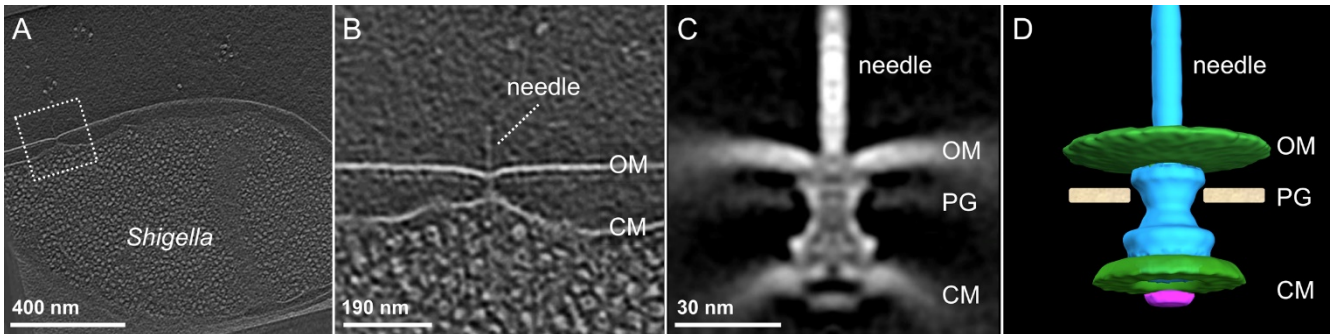

**Figure S8. The injectisome structure from osmotically shocked *Shigella* cells.** (A) A section from a 3-D tomographic reconstruction of an osmotically shocked cell. One injectisome is shown highlighted in (B). The averaged structure is shown in a central section (C) and a surface view (D). The major portion of the cytoplasmic complex is absent from the T3SS seen in these cells.



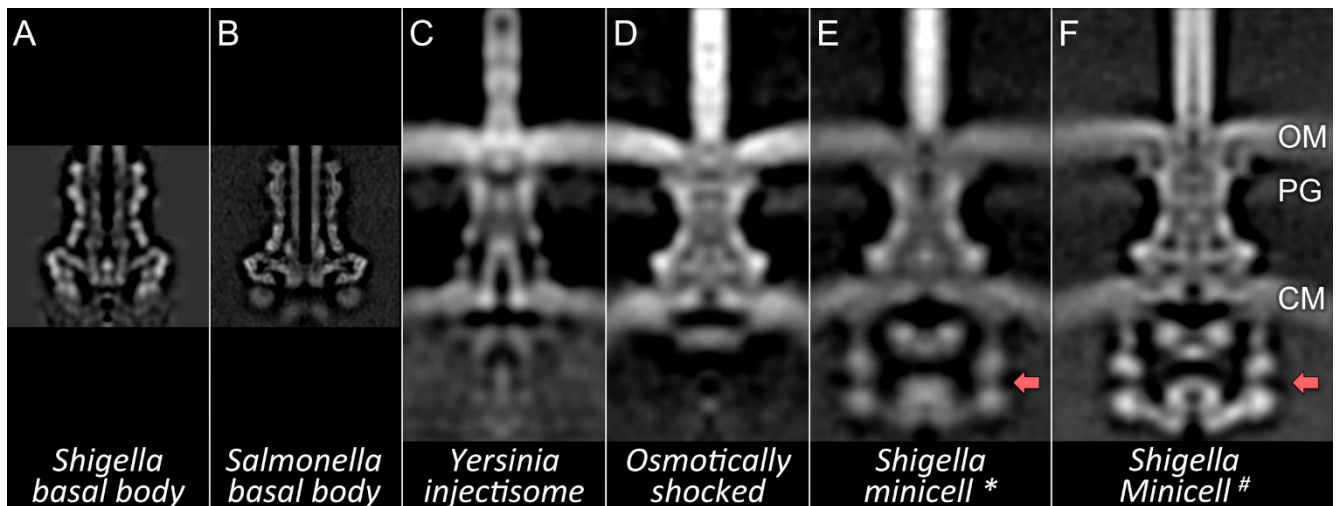

**Figure S9. Comparative analysis of available structures reveals the novel cytoplasmic complex in *Shigella* minicells.** Central slices of the density maps from (A) the *Shigella* basal body (EMD-1617), (B) the *Salmonella* basal body (EMD-1875), (C) the *in situ* *Yersinia* whole cell injectisome (EMD-5694), (D) the *Shigella* injectisome from osmotically shocked cells (this study), (E) the intact injectisome (without drift correction and CTF correction) and (F) the intact injectisome from *Shigella* minicells (with drift correction and CTF correction, EMD-2667, this study). The pod structures present in the *Shigella* minicell structure (red arrow) are not visible in the whole cell *Yersinia* injectisome or the osmotically shocked *S. flexneri* cells (D).

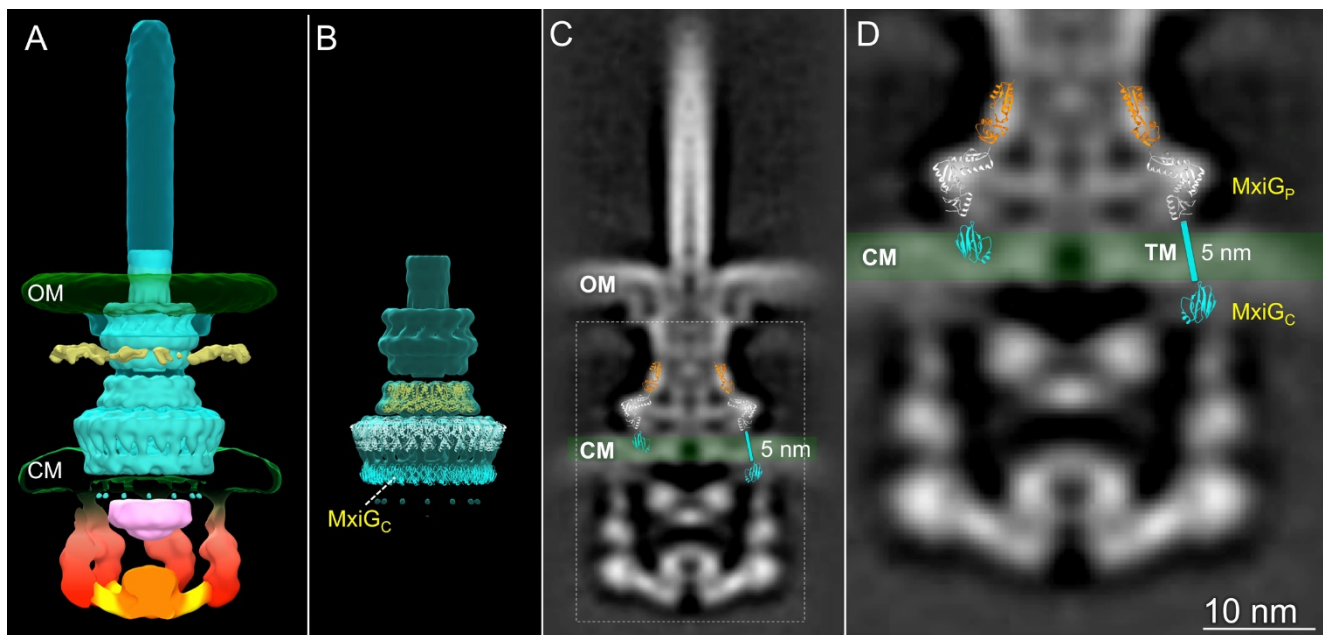

**Figure S10. Docking available crystal structures and the high-resolution basal body structure into our map reveals an extended cytoplasmic domain of MxiG.** (A) The *Salmonella* needle complex structure (EMD-1875) was fitted into our map. The inset is the EM map with the fitting of InvG (PDB-3J1V), PrgH<sub>P</sub> (PDB-3J1X) and PrgH<sub>C</sub> (PDB-3J1W). (B) Fitting the atomic structures of InvG, PrgH<sub>P</sub> and PrgH<sub>C</sub> results in the cytoplasmic domain of PrgH<sub>C</sub> localizing to the cytoplasmic membrane (CM) instead of in the cytoplasm (C). To correct this, we built a new model of the cytoplasmic domain of MxiG (MxiG<sub>C</sub>, the homolog of PrgH<sub>C</sub>, *SI Appendix*, Table S1) by shifting MxiG<sub>C</sub> towards the cytoplasm (D).

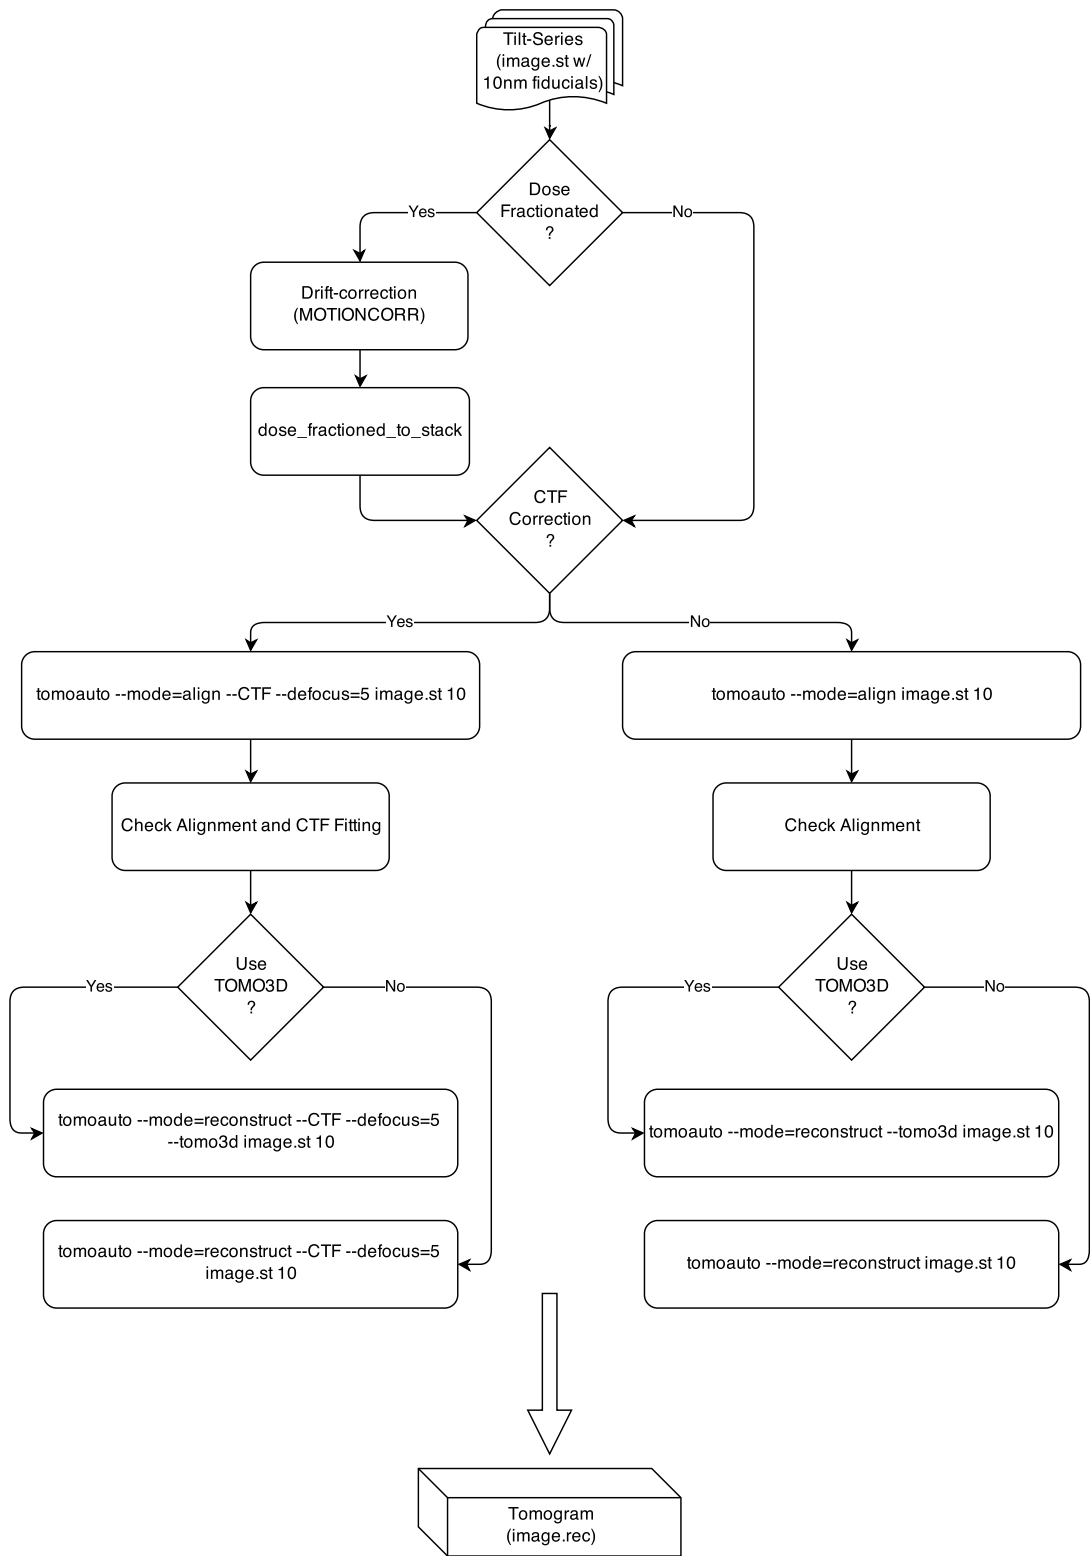

**Figure S11. Flowchart from a tilt series to a 3-D reconstruction by using Tomoauto.**

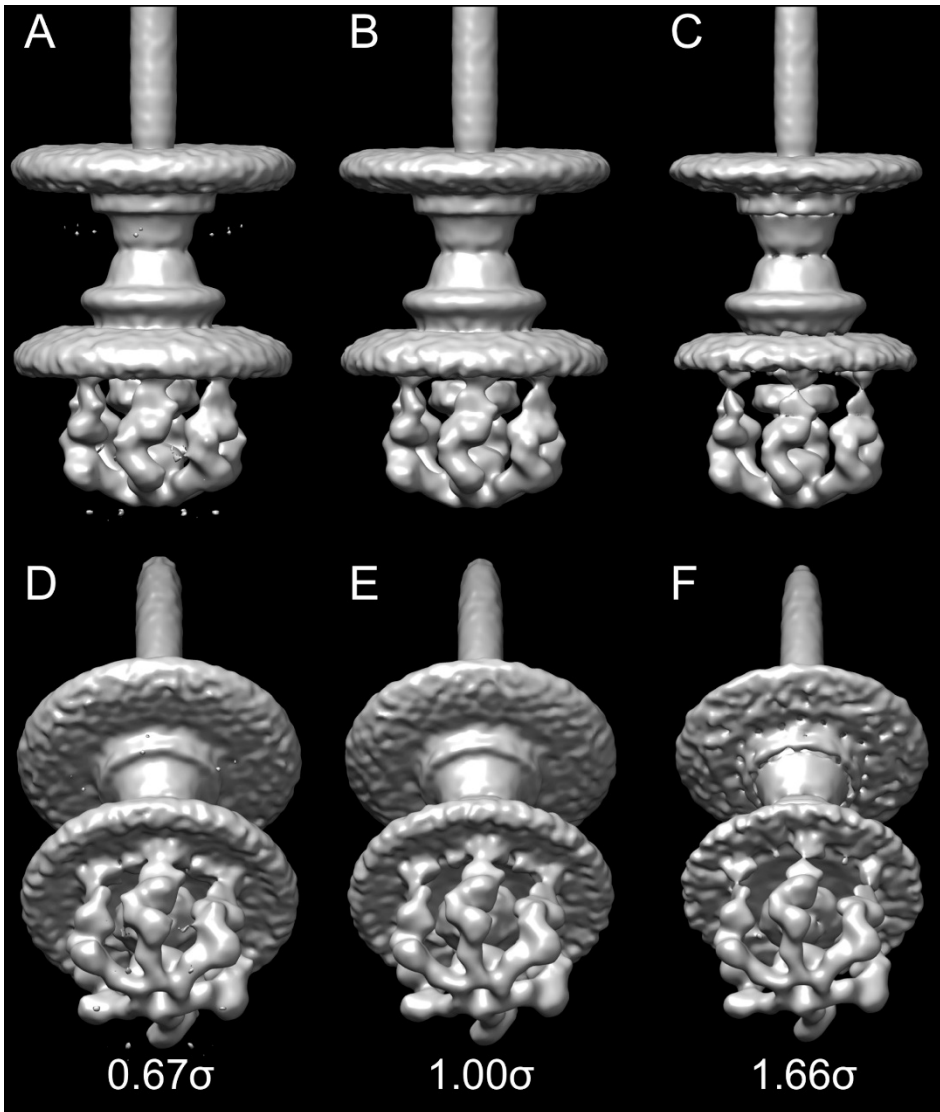

**Figure S12. Three isosurface maps are rendered in three different contour levels  $0.67\sigma$  (A, D),  $1.00\sigma$  (B, E), and  $1.66\sigma$  (C, F), respectively. Noticeably, there are extra weak densities underneath the cytoplasmic membrane (D).**

### Supplementary Movies:

Movie S1. 3-D reconstruction of a *Shigella* minicell derived from the WT strain shows multiple intact injectisomes embedded in the cell envelope.

Movie S2. Cryo-electron tomography of a red blood cell infected by *Shigella* minicells. The injectisome and its mediated minicell-host interaction are shown at high resolution.

Movie S3. An animation showing the transition from initial minicells to molecular architecture of the intact injectisome in *Shigella*. The high-resolution structure is important for understanding of the *Shigella*-host interaction.
